# Supplementary material for: Factors predicting cardiovascular events in chronic kidney disease patients. Role of subclinical atheromatosis extent assessed by vascular ultrasound
Source: PLOS journal article supplement (doi:10.1371/journal.pone.0186665), 2017-10-18
Supplement: S3 (10.1371/journal.pone.0186665.s003) [file journal.pone.0186665.s003]

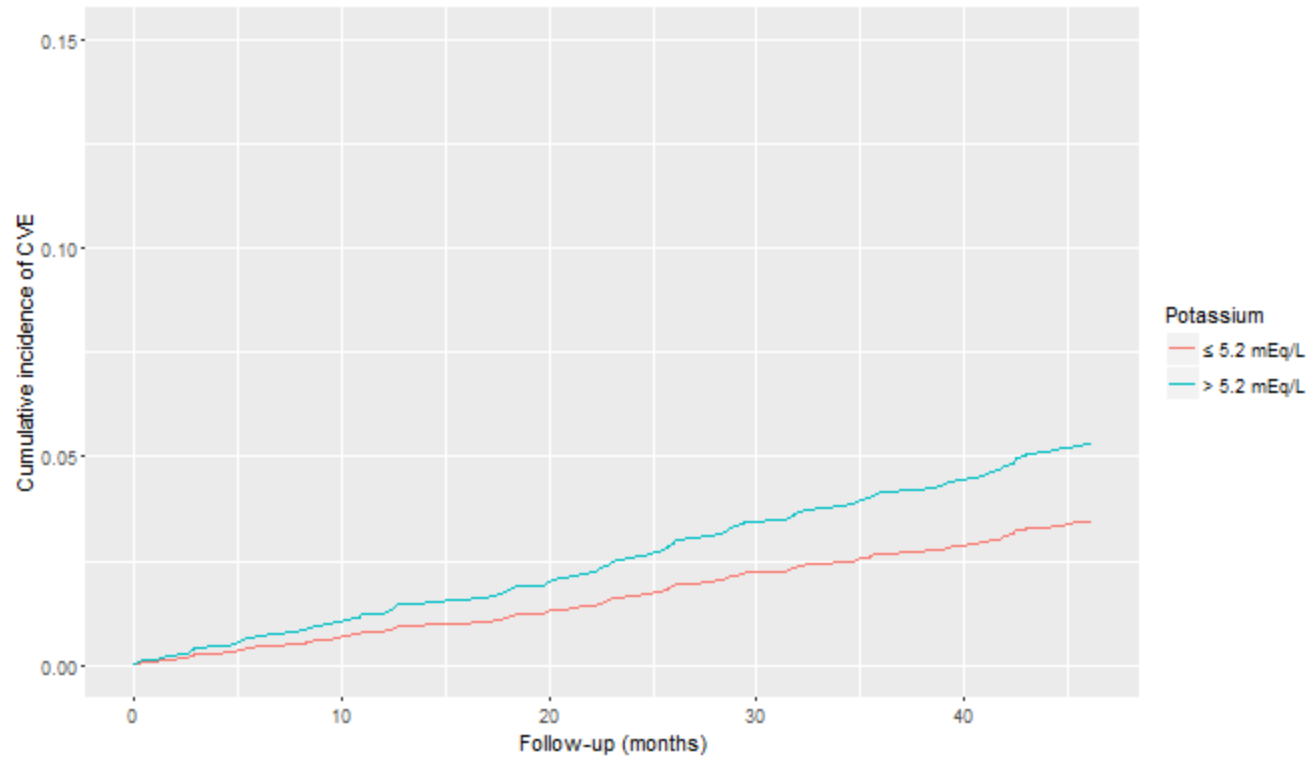

**Figure S3:** Adjusted cumulative incidence of CVE in CKD patients not in dialysis. Effect of levels of potassium.
